# Supplementary material for: Pulling Metallic Glasses Ductile
Source: Research Square preprint supplement (doi:10.21203/rs.3.rs-100612/v1), 2020-11-05
Supplement: Supplementary file 1 [file e455a0b2a241dda83ee597cc.docx]

**Supplementary table 1. Previous methods for ductility enhancement**

| Method Description | Effect on glass or liquid | Effect | Mechanical tests | Homogeneous/  Inhomogeneous | Alloys | Change in thermal signal | Reference |
| --- | --- | --- | --- | --- | --- | --- | --- |
| High temperature creep | Glass | Increased plasticity (in some samples) | Compression | Homogenous deformation, possible anisotropy | Zr50Cu40Al10  Zr65Cu17Ni8Al10  Zr55Cu30Ni5Al10 | No difference observed vs. as-cast | [1, 2] |
| Elastostatic loading | Glass | Condition dependent rejuvenation or  relaxation | Nanoindentation | Homogenous | Cu57Zr43  Zr35Ti30Be27.5Cu7.5 | 0.247-0.4 KJ/mol | [3-5] |
| Hot rolling | Liquid | Unstudied | N/A | Homogenous | Zr44Ti11Cu10Ni10Be25 | N/A | [6] |
| Twin roll casting | Liquid | Rejuvenation | Hardness | Homogenous | Zr41.2Ti13.8Cu12.5Ni10Be22.5 | 0.2 KJ/mol | [7] |
| Notched uniaxial compression (Triaxial) | Glass | Rejuvenation, decreased hardness, increased plasticity | Tensile and hardness | Inhomogeneous | Zr64.13Cu15.75Ni10.12Al10 | 0.59 KJ/mol | [8, 9] |
| High pressure annealing | Glass | Rejuvenation, increased density, shear and elastic modulus | N/A | N/A | La60Ni15Al25 | 0.1-0.9 KJ/mol | [10] |
| High pressure torsion | Glass | Rejuvenation | Nanoindentation | Inhomogeneous | Zr50.7Cu28Ni9Al12.3  Zr50Cu40Al10 | 0.5-1.1 KJ/mol | [5, 11, 12] |
| Cyclic nanoindentation | Glass | Increased hardness | Nanoindentation | Inhomogeneous | Fe41Co7Cr15Mo14C15B6Y2 | N/A | [13] |
| Uniaxial compression | Glass | Increase in plastic strain | Uniaxial compression | Homogenous | Ni62Nb38 | .179 (from as cast) (.3 total) KJ/g | [14] |
| Dynamic excitation upon cooling | Glass | Rejuvenation | DMA | Homogenous | Zr58.5Cu15.6Ni12.8Al10.3Nb2.8  Zr66.5Cu33.5  Pd77.5Cu6Si16.5 | .5 to 5 KJ/mol | [15] |
| Cyclic compression | Glass | Rejuvenation  elastic, plastic anisotropy | Compression testing  Vickers hardness | Inhomogeneous | Zr61Cu27Fe2Al10 | 0.25 KJ/mol | [16] |
| Laser shock peening. Shockwave imparted by a laser | Glass | Rejuvenation | Compression  testing | Inhomogeneous | Zr52.5Cu17.9Ni14.6Al10.0Ti5.0  Zr41.2Ti13.8Cu12.5Ni10Be22.5 | N/A | [17, 18] |

**Cont'd supplementary table 1. Previous methods for ductility enhancement**

| Method Description | Effect on glass or liquid | Effect | Mechanical tests | Homogeneous/  Inhomogeneous | Alloys | Magnitude of thermal signal | Reference |
| --- | --- | --- | --- | --- | --- | --- | --- |
| Shot peening | Glass | Increased plasticity (hardening by residual stress, softening by sheer bands) | Microhardness, compression | Inhomogeneous | Zr41.25Ti13.75Ni10Cu12.5Be22.5 | N/A | [19, 20] |
| Shock compression | Glass | Rejuvenation | N/A | Inhomogeneous | Zr55Cu30Ni5Al10 | .423 to 1.32KJ/mol | [5] |
| Thermal cycling | Glass | Rejuvenation, increased plasticity, decreased hardness | Uniaxial compression, hardness | Inhomogeneous | Cu46Zr46Al7Gd1  La55Ni20Al25 (ribbon)  La55Ni10Al35  Zr62Cu24Fe5Al9  ZrCuNiAl(Nb)  ZrTiCuNiBe  PdNiCuP  PtNiCuP | (1.08-.74) = .34 KJ/mol | [21-23] [24-26] |
| Cold wire drawing | Glass | Decrease in yield stress, increase in fracture stress and plasticity | Tensile testing | Inhomogeneous | Pd77.5Cu6Si16.5 | N/A | [27] |
| Cold rolling | Glass | Increased ductility  Work-hardening  rejuvenation | Nanoindentation,  ultrasonic testing | Inhomogeneous | Zr55Cu30Ni5Al10  Cu47.5Zr47.5Al5  Zr46.5Cu45Al7Ti1.5 | .3-.5 KJ/mol | [28-30] |
| Ball milling | Glass | rejuvenation | None | Inhomogeneous | Pd40Cu30Ni10P20  Zr70Cu20Ni10 | <.1KJ/g | [31, 32] |
| Neutron and high energy particles irradiation | Glass | Rejuvenation or relaxation, increased ductility | Bending and Tension | Homogenous | many | N/A | [33-36] |
| Fatigue coaxing | Glass | Increase in fatigue limit | 3-point bending | Inhomogeneous | Zr41.8Ti12.9Ni9.5Cu12Be23.8 | N/A | [37] |
| Equal channel angular processing | Glass | Decreased yield strength, increased plasticity, likely due to shear banding not rejuvenation | Uniaxial compression | Inhomogeneous | Zr57Cu20Al10Ni8Ti5 | N/A | [38, 39] |
| Hot Wire Drawn | Liquid | Decreased modulus and hardness | Nanoindentation | Homogeneous | Pd40Cu30Ni10P20 | 28% increase from as cast | [34] |
| Static mechanical loading | glass | Strain hardening  Increased plasticity | Tension, compression | Shear Transformation Zones | various | 40% | [40-42] |
| Cooling rate and annealing temperature | liquid | Density, Hardness, Modulus |  | Homogenous | Cu-based, ZrCuNiAl, MgCuY | yes | [43-45] |

**Supplementary model derivation 1. Cooling rate for pulled wires.**

Assuming that the temperature is uniform throughout the wire deforming region, varying with time (relative position) but not with absolute position, and a constant heat transfer coefficient; we can use the lumped capacitance model to obtain the change in temperature.

From newton’s law of cooling:

Where,

is the heat rate transfer out of the body

is the heat transfer coefficient

is the heat transfer surface area

is the temperature of the object’s surface

is the environment or room temperature

In the case of an incompressible material with a total internal energy U characterized by a single uniform temperature T(t), The heat capacity of the body C is .The internal energy may be written in terms of the temperature of the body, the heat capacitance and a reference temperature at which the internal energy is zero:

Differentiating U with respect to time:

If no work is exerted, by the first law of thermodynamics:

Thus:

Where:

τ is the time constant of the system

C is the heat capacity

m is the mass of the material

c is the material specific heat capacity

When the environmental temperature is constant with time, we can define and the equation becomes:

Which solution by integration from the initial condition is:

Where ΔT(0) is the temperature difference at time 0, and to obtain the temperature at a given time t:

Which becomes a function of the time and the heat transfer surface area.

If we assume that the region of interest from the wire it’s a cylinder-shaped region with constant volume, we can obtain the change in surface area with respect to the change in length.

The volume of a cylinder is given by:

Where,

is the radius

is the length of the wire

Solving for the radius we get:

The curved surface area of the cylinder is given by:

and so:

So we can stablish:

Finally:

Where the volume (V) is constant and the length (L) varies with time.

**Supplementary Method 1.**

**Supplementary Figure 1. Temperature profile of wire annealing treatment.** Salt bath is preheated to 60 K above the calorimetric cooling glass transition temperature (683 K) for at least an hour. Sample wires are submerged in the salt bath for 180 s before being retrieved and allowed to air cool.

1. Tong, Y., et al., *Recovering compressive plasticity of bulk metallic glasses by high-temperature creep.* Scripta Materialia, 2013. **69**(8): p. 570-573.

2. Tong, Y., et al., *Mechanical rejuvenation in bulk metallic glass induced by thermo-mechanical creep.* Acta Materialia, 2018. **148**: p. 384-390.

3. Lee, J.-C., *Calorimetric study of β-relaxation in an amorphous alloy: An experimental technique for measuring the activation energy for shear transformation.* Intermetallics, 2014. **44**: p. 116-120.

4. Zhang, M., et al., *Mechanical relaxation-to-rejuvenation transition in a Zr-based bulk metallic glass.* Scientific Reports, 2017. **7**(1): p. 1-12.

5. Ding, G., et al., *Ultrafast extreme rejuvenation of metallic glasses by shock compression.* Science advances, 2019. **5**(8): p. eaaw6249.

6. Martinez, R., G. Kumar, and J. Schroers, *Hot rolling of bulk metallic glass in its supercooled liquid region.* Scripta Materialia, 2008. **59**(2): p. 187-190.

7. Zhang, L., et al., *Rejuvenated metallic glass strips produced via twin-roll casting.* Journal of Materials Science & Technology, 2020. **38**: p. 73-79.

8. Pan, J., et al., *Strain-hardening and suppression of shear-banding in rejuvenated bulk metallic glass.* Nature, 2020. **578**(7796): p. 559-562.

9. Pan, J., et al., *Extreme rejuvenation and softening in a bulk metallic glass.* Nature communications, 2018. **9**(1): p. 1-9.

10. Wang, C., et al., *High stored energy of metallic glasses induced by high pressure.* Applied Physics Letters, 2017. **110**(11): p. 111901.

11. Meng, F., et al., *Reversible transition of deformation mode by structural rejuvenation and relaxation in bulk metallic glass.* Applied Physics Letters, 2012. **101**(12): p. 121914.

12. Wang, Y., et al., *Introducing a strain-hardening capability to improve the ductility of bulk metallic glasses via severe plastic deformation.* Acta materialia, 2012. **60**(1): p. 253-260.

13. Packard, C., L. Witmer, and C. Schuh, *Hardening of a metallic glass during cyclic loading in the elastic range.* Applied Physics Letters, 2008. **92**(17): p. 171911.

14. Lee, S.-C., et al., *Microstructural evolution of an elastostatically compressed amorphous alloy and its influence on the mechanical properties.* Scripta Materialia, 2008. **58**(7): p. 591-594.

15. Küchemann, S. and R. Maaß, *Gamma relaxation in bulk metallic glasses.* Scripta Materialia, 2017. **137**: p. 5-8.

16. Louzguine-Luzgin, D., et al., *On room-temperature quasi-elastic mechanical behaviour of bulk metallic glasses.* Acta Materialia, 2017. **129**: p. 343-351.

17. Liang, M., et al., *Effect of laser shock peening and its size-dependence on the compressive plasticity of Zr-based bulk metallic glass.* Journal of Materials Processing Technology, 2018. **251**: p. 47-53.

18. Cao, Y., et al., *Laser shock peening on Zr-based bulk metallic glass and its effect on plasticity: experiment and modeling.* Scientific reports, 2015. **5**: p. 10789.

19. Zhang, Y., W. Wang, and A. Greer, *Making metallic glasses plastic by control of residual stress.* Nature materials, 2006. **5**(11): p. 857-860.

20. Concustell, A., et al., *Structural relaxation and rejuvenation in a metallic glass induced by shot-peening.* Philosophical Magazine Letters, 2009. **89**(12): p. 831-840.

21. Ketov, S., et al., *Rejuvenation of metallic glasses by non-affine thermal strain.* Nature, 2015. **524**(7564): p. 200-203.

22. Guo, W., R. Yamada, and J. Saida, *Rejuvenation and plasticization of metallic glass by deep cryogenic cycling treatment.* Intermetallics, 2018. **93**: p. 141-147.

23. Tong, Y., et al., *Structural rejuvenation in bulk metallic glasses.* Acta Materialia, 2015. **86**: p. 240-246.

24. Guo, W., et al., *Rejuvenation of Zr-based bulk metallic glass matrix composite upon deep cryogenic cycling.* Materials Letters, 2019. **247**: p. 135-138.

25. Ketkaew, J., et al., *The effect of thermal cycling on the fracture toughness of metallic glasses.* Acta Materialia, 2020. **184**: p. 100-108.

26. Li, B.S., S.H. Xie, and J.J. Kruzic, *Toughness enhancement and heterogeneous softening of a cryogenically cycled Zr-Cu-Ni-Al-Nb bulk metallic glass.* Acta Materialia, 2019. **176**: p. 278-288.

27. Takayama, S., *Drawing of Pd77. 5Cu6Si16. 5 metallic glass wires.* Materials Science and Engineering, 1979. **38**(1): p. 41-48.

28. Chen, H., *Stored energy in a cold‐rolled metallic glass.* Applied Physics Letters, 1976. **29**(6): p. 328-330.

29. Liu, J., et al., *Shear band evolution and hardness change in cold-rolled bulk metallic glasses.* Acta materialia, 2010. **58**(14): p. 4827-4840.

30. Song, K., et al., *Significant tensile ductility induced by cold rolling in Cu47. 5Zr47. 5Al5 bulk metallic glass.* Intermetallics, 2011. **19**(10): p. 1394-1398.

31. Yavari, A.R., et al., *Excess free volume in metallic glasses measured by X-ray diffraction.* Acta Materialia, 2005. **53**(6): p. 1611-1619.

32. Shao, H., et al., *High density of shear bands and enhanced free volume induced in Zr70Cu20Ni10 metallic glass by high-energy ball milling.* Journal of alloys and compounds, 2013. **548**: p. 77-81.

33. Gerling, R., F.-P. Schimansky, and R. Wagner, *Restoration of the ductility of thermally embrittled amorphous alloys under neutron-irradiation.* Acta Metallurgica, 1987. **35**(5): p. 1001-1006.

34. Baumer, R. and M. Demkowicz, *Radiation response of amorphous metal alloys: Subcascades, thermal spikes and super-quenched zones.* Acta Materialia, 2015. **83**: p. 419-430.

35. Magagnosc, D.J., et al., *Tunable Tensile Ductility in Metallic Glasses.* Scientific Reports, 2013. **3**.

36. Magagnosc, D.J., et al., *Effect of ion irradiation on tensile ductility, strength and fictive temperature in metallic glass nanowires.* Acta Materialia, 2014. **74**: p. 165-182.

37. El-Shabasy, A.B. and J.J. Lewandowski, *Fatigue coaxing experiments on a Zr-based bulk-metallic glass.* Scripta Materialia, 2010. **62**(7): p. 481-484.

38. Lee, C.-M., K.-W. Park, and J.-C. Lee, *Plasticity improvement of a bulk amorphous alloy based on its viscoelastic nature.* Scripta materialia, 2008. **59**(8): p. 802-805.

39. Tong, Y., et al., *Residual elastic strain induced by equal channel angular pressing on bulk metallic glasses.* Acta materialia, 2013. **61**(4): p. 1204-1209.

40. Pan, J., et al., *Strain-hardening and suppression of shear-banding in rejuvenated bulk metallic glass.* Nature, 2020. **578**(7796): p. 559-+.

41. Pan, J., et al., *Extreme rejuvenation and softening in a bulk metallic glass.* Nature Communications, 2018. **9**.

42. Wang, Z.T., et al., *Densification and Strain Hardening of a Metallic Glass under Tension at Room Temperature.* Physical Review Letters, 2013. **111**(13).

43. Wakeda, M., et al., *Controlled Rejuvenation of Amorphous Metals with Thermal Processing.* Scientific Reports, 2015. **5**.

44. Saida, J., et al., *Thermal rejuvenation in metallic glasses.* Science and Technology of Advanced Materials, 2017. **18**(1): p. 152-162.

45. Guo, W., et al., *Thermal Rejuvenation of an Mg-Based Metallic Glass.* Metallurgical and Materials Transactions a-Physical Metallurgy and Materials Science, 2019. **50a**(3): p. 1125-1129.
